# Supplementary material for: Multicomponent Antibiofilm Lipid Nanoparticles as Novel Platform to Ameliorate Resveratrol Properties: Preliminary Outcomes on Fibroblast Proliferation and Migration
Source: MDPI journal article supplement (doi:10.3390/ijms24098382), 2023-05-06
Supplement: s1 [file s1]

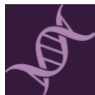

## Supplementary material

Article

# Multicomponent Antibiofilm Lipid Nanoparticles as Novel Platform to Ameliorate Resveratrol Properties: Preliminary Outcomes on fibroblast Proliferation and Migration

Giuseppe Angellotti<sup>1,2,x</sup>, Giulia Di Prima<sup>2,x</sup>, Fabio D'Agostino<sup>3</sup>, Emanuela Peri<sup>2</sup>, Maria Rita Tricoli<sup>4</sup>, Elena Belfiore<sup>1,2</sup>, Mario Allegra<sup>2</sup>, Patrizia Cancemi<sup>2</sup> and Viviana De Caro<sup>2\*</sup>

<sup>1</sup> Department of Surgical, Oncological and Oral Sciences, University of Palermo, 90127 Palermo, Italy. giuseppe.angellotti@unipa.it (GA), elena.belfiore@unipa.it (EB)

<sup>2</sup> Department of Biological, Chemical and Pharmaceutical Sciences and Technologies, University of Palermo, 90123 Palermo, Italy. giulia.diprima@unipa.it (GDP), emanuela.peri@unipa.it (EP), mario.allegra@unipa.it (MA), patrizia.cancemi@unipa.it (PC), viviana.decaro@unipa.it (VDC)

<sup>3</sup> Institute for the Study of Anthropogenic Impacts and Sustainability in the Marine Environment, National Research Council (IAS—CNR), Campobello di Mazara, 91021 Trapani, Italy. fabio.dagostino@cnr.it (FD)

<sup>4</sup> Department of Health Promotion, Maternal-Childhood, Internal Medicine of Excellence G. D'Alessandro, Section of Microbiology, University of Palermo, 90127 Palermo, Italy, mariarita.tricoli@unipa.it. (MRT)

<sup>x</sup> The authors equally contributed to this work

<sup>\*</sup> Correspondence: viviana.decaro@unipa.it; Tel.: +3909123891926

### Data reported as supplementary material:

- **Table S1:** Curve-fitting parameters calculated when considering the *Zero* order model for RSV release studies to 1-octanol.
- **Table S2:** Curve-fitting parameters calculated when considering the *Zero* order model for the RSV release studies to citrate buffer pH 5.5.
- **Table S3:** Curve-fitting parameters calculated when considering the *Zero* order model for the RSV release studies to citrate buffer pH 5.5 containing 0.1% (w/v) of  $\beta$ -CD.
- **Table S4:** Curve-fitting parameters calculated when considering the *First* order model for the RSV release studies to citrate buffer pH 5.5.
- **Table S5:** Curve-fitting parameters calculated when considering the *First* order model for the RSV release studies to citrate buffer pH 5.5 containing 0.1% (w/v) of  $\beta$ -CD.
- **Table S6:** Curve-fitting parameters calculated when considering the *Higuchi* model for RSV release studies to 1-octanol.
- **Table S7:** Curve-fitting parameters calculated when considering the *Higuchi* model for the RSV release studies to citrate buffer pH 5.5.
- **Table S8:** Curve-fitting parameters calculated when considering the *Higuchi* model for the RSV release studies to citrate buffer pH 5.5 containing 0.1% (w/v) of  $\beta$ -CD.
- **Table S9:** Curve-fitting parameters calculated when considering the *Baker-Lonsdale* model for RSV release studies to 1-octanol.
- **Table S10:** Curve-fitting parameters calculated when considering the *Baker-Lonsdale* model for the RSV release studies to citrate buffer pH 5.5.

- **Table S11:** Curve-fitting parameters calculated when considering the Baker-Lonsdale model for the RSV release studies to citrate buffer pH 5.5 containing 0.1% (w/v) of  $\beta$ -CD.
- **Table S12:** Curve-fitting parameters calculated when considering the Hixon-Crowell model for RSV release studies to 1-octanol.
- **Table S13:** Curve-fitting parameters calculated when considering the Hixon-Crowell model for the RSV release studies to citrate buffer pH 5.5.
- **Table S14:** Curve-fitting parameters calculated when considering the Hixon-Crowell model for the RSV release studies to citrate buffer pH 5.5 containing 0.1% (w/v) of  $\beta$ -CD.
- **Table S15:** Curve-fitting parameters calculated when considering the Kormeyer-Peppas model for RSV release studies to 1-octanol.

**Table S1.** Curve-fitting parameters calculated when considering the Zero order model for RSV release studies to 1-octanol. Mean  $\pm$  SE (n=3).

| Kinetic model | Time | NLC                                                                     | NLC-Su                                                                  | NLC-Su-R                                                                 |
|---------------|------|-------------------------------------------------------------------------|-------------------------------------------------------------------------|--------------------------------------------------------------------------|
| 1             | 6 h  | $k_0 = 0.062 \pm 0.005$<br>$R^2 = 0.98830$                              | $k_0 = 0.043 \pm 0.003$<br>$R^2 = 0.94660$                              | $k_0 = 0.087 \pm 0.010$<br>$R^2 = 0.95440$                               |
| 1a            | 6 h  | $k_0 = 0.065 \pm 0.001$<br>$t_{lag} = 0.23 \pm 0.22$<br>$R^2 = 0.99150$ | $k_0 = 0.053 \pm 0.003$<br>$t_{lag} = 0.83 \pm 0.13$<br>$R^2 = 0.99090$ | $k_0 = 0.083 \pm 0.003$<br>$t_{lag} = -0.21 \pm 0.35$<br>$R^2 = 0.95740$ |

**Table S2.** Curve-fitting parameters calculated when considering the Zero order model for the RSV release studies to citrate buffer pH 5.5. Mean  $\pm$  SE (n=3).

| Kinetic model | Time | NLC                                                                      | NLC-Su                                                                   | NLC-Su-R                                                                |
|---------------|------|--------------------------------------------------------------------------|--------------------------------------------------------------------------|-------------------------------------------------------------------------|
| 1             | 6 h  | $k_0 = 0.066 \pm 0.003$<br>$R^2 = 0.82946$                               | $k_0 = 0.051 \pm 0.003$<br>$R^2 = 0.94947$                               | $k_0 = 0.029 \pm 0.001$<br>$R^2 = 0.96763$                              |
| 1a            | 6 h  | $k_0 = 0.052 \pm 0.007$<br>$t_{lag} = -1.50 \pm 0.85$<br>$R^2 = 0.89870$ | $k_0 = 0.045 \pm 0.003$<br>$t_{lag} = -0.39 \pm 0.05$<br>$R^2 = 0.97025$ | $k_0 = 0.033 \pm 0.001$<br>$t_{lag} = 0.27 \pm 0.06$<br>$R^2 = 0.99802$ |

**Table S3.** Curve-fitting parameters calculated when considering the Zero order model for the RSV release studies to citrate buffer pH 5.5 containing 0.1% (w/v) of  $\beta$ -CD. Mean  $\pm$  SE (n=3).

| Kinetic model | Time | NLC                                                   | NLC-Su                                                 | NLC-Su-R                                              |
|---------------|------|-------------------------------------------------------|--------------------------------------------------------|-------------------------------------------------------|
| 1             | 7 h  | <i>Null</i>                                           | $k_0 = 0.087 \pm 0.006$<br>$R^2 = 0.55293$             | <i>null</i>                                           |
| 1a            | 7 h  | $k_0 = 0.038 \pm 0.007$<br>$t_{lag} = -9.59 \pm 2.78$ | $k_0 = 0.055 \pm 0.003$<br>$t_{lag} = -3.49 \pm 0.450$ | $k_0 = 0.078 \pm 0.010$<br>$t_{lag} = -3.25 \pm 0.76$ |

$R^2 = 0.80396$

$R^2 = 0.98101$

$R^2 = 0.90384$

**Table S4.** Curve-fitting parameters calculated when considering the First order model for the RSV release studies to citrate buffer pH 5.5. Mean  $\pm$  SE (n=3).

| Kinetic model | Time    | NLC                          | NLC-Su                       | NLC-Su-R                     |
|---------------|---------|------------------------------|------------------------------|------------------------------|
| 2             | 24 days | $k_1 = 1.808 \pm 0.538$      | $k_1 = 0.166 \pm 0.005$      | $k_1 = 0.131 \pm 0.009$      |
|               |         | $R^2 = 0.62881$              | $R^2 = 0.99303$              | $R^2 = 0.96714$              |
| 2a            | 24 days | $k_1 = 0.155 \pm 0.013$      | $k_1 = 0.162 \pm 0.004$      | $k_1 = 0.122 \pm 0.006$      |
|               |         | $t_{lag} = -2.366 \pm 0.338$ | $t_{lag} = -0.247 \pm 0.088$ | $t_{lag} = -0.862 \pm 0.200$ |
|               |         | $R^2 = 0.96305$              | $R^2 = 0.99478$              | $R^2 = 0.98930$              |

**Table S5.** Curve-fitting parameters calculated when considering the First order model for the RSV release studies to citrate buffer pH 5.5 containing 0.1% (w/v) of  $\beta$ -CD. Mean  $\pm$  SE (n=3).

| Kinetic model                | Time            | NLC                          | NLC-Su                       | NLC-Su-R                     |
|------------------------------|-----------------|------------------------------|------------------------------|------------------------------|
| 2                            | 26 h            | $k_1 = 0.151 \pm 0.009$      | $k_1 = 0.106 \pm 0.012$      | $k_1 = 0.240 \pm 0.013$      |
|                              |                 | $R^2 = 0.63674$              | $R^2 = 0.87575$              | $R^2 = 0.088414$             |
| 2                            | 48 h            | $k_1 = 0.151 \pm 0.009$      | $k_1 = 0.101 \pm 0.012$      | $k_1 = 0.240 \pm 0.015$      |
|                              |                 | $R^2 = 0.87948$              | $R^2 = 0.91686$              | $R^2 = 0.94788$              |
| 2a                           | 26 h            | $k_1 = 0.063 \pm 0.008$      | $k_1 = 0.070 \pm 0.004$      | $k_1 = 0.172 \pm 0.019$      |
|                              |                 | $t_{lag} = -7.767 \pm 1.684$ | $t_{lag} = -3.576 \pm 0.645$ | $t_{lag} = -0.980 \pm 0.373$ |
|                              | $R^2 = 0.94834$ | $R^2 = 0.98257$              | $R^2 = 0.94651$              |                              |
|                              | 48 h            | $k_1 = 0.058 \pm 0.006$      | $k_1 = 0.064 \pm 0.004$      | $k_1 = 0.172 \pm 0.027$      |
| $t_{lag} = -8.752 \pm 1.502$ |                 | $t_{lag} = -4.322 \pm 0.742$ | $t_{lag} = -0.990 \pm 0.523$ |                              |
|                              |                 | $R^2 = 0.98359$              | $R^2 = 0.98723$              | $R^2 = 0.96506$              |

**Table S6.** Curve-fitting parameters calculated when considering the Higuchi model for RSV release studies to 1-octanol. Mean  $\pm$  SE (n=3).

| Kinetic model | Time | NLC                         | NLC-Su                      | NLC-Su-R                    |
|---------------|------|-----------------------------|-----------------------------|-----------------------------|
| 3             | 28 h | $k_H = 0.156 \pm 0.006$     | $k_H = 0.128 \pm 0.004$     | $k_H = 0.166 \pm 0.009$     |
|               |      | $R^2 = 0.95030$             | $R^2 = 0.90860$             | $R^2 = 0.95960$             |
| 3             | 48 h | $k_H = 0.146 \pm 0.005$     | $k_H = 0.124 \pm 0.003$     | $k_H = 0.151 \pm 0.007$     |
|               |      | $R^2 = 0.92930$             | $R^2 = 0.92140$             | $R^2 = 0.87870$             |
|               | 28 h | $k_H = 0.171 \pm 0.005$     | $k_H = 0.145 \pm 0.001$     | $k_H = 0.169 \pm 0.005$     |
|               |      | $t_{lag} = 1.659 \pm 0.134$ | $t_{lag} = 2.306 \pm 0.379$ | $t_{lag} = 0.386 \pm 0.005$ |

|           |             |                             |                             |                              |
|-----------|-------------|-----------------------------|-----------------------------|------------------------------|
| <b>3a</b> | <b>48 h</b> | $R^2 = 0.99510$             | $R^2 = 0.99500$             | $R^2 = 0.96310$              |
|           |             | $k_H = 0.153 \pm 0.003$     | $k_H = 0.134 \pm 0.001$     | $k_H = 0.148 \pm 0.002$      |
|           |             | $t_{lag} = 1.089 \pm 0.004$ | $t_{lag} = 2.000 \pm 0.001$ | $t_{lag} = -0.575 \pm 0.010$ |
|           |             | $R^2 = 0.94750$             | $R^2 = 0.97370$             | $R^2 = 0.88090$              |

**Table S7.** Curve-fitting parameters calculated when considering the Higuchi model for the RSV release studies to citrate buffer pH 5.5. Mean  $\pm$  SE (n=3).

| Kinetic model | Time           | NLC                          | NLC-Su                       | NLC-Su-R                     |
|---------------|----------------|------------------------------|------------------------------|------------------------------|
| <b>3</b>      | <b>24 days</b> | $k_H = 0.224 \pm 0.010$      | $k_H = 0.210 \pm 0.004$      | $k_H = 0.202 \pm 0.002$      |
|               |                | $R^2 = 0.61968$              | $R^2 = 0.92706$              | $R^2 = 0.98013$              |
| <b>3a</b>     | <b>24 days</b> | $k_H = 0.201 \pm 0.001$      | $k_H = 0.210 \pm 0.004$      | $k_H = 0.201 \pm 0.002$      |
|               |                | $t_{lag} = -3.242 \pm 0.760$ | $t_{lag} = -0.029 \pm 0.113$ | $t_{lag} = -0.201 \pm 0.099$ |
|               |                | $R^2 = 0.88933$              | $R^2 = 0.92394$              | $R^2 = 0.98413$              |

**Table S8.** Curve-fitting parameters calculated when considering the Higuchi model for the RSV release studies to citrate buffer pH 5.5 containing 0.1% (w/v) of  $\beta$ -CD. Mean  $\pm$  SE (n=3).

| Kinetic model | Time        | NLC                           | NLC-Su                       | NLC-Su-R                      |
|---------------|-------------|-------------------------------|------------------------------|-------------------------------|
| <b>3</b>      | <b>26 h</b> | Null                          | $k_H = 0.178 \pm 0.005$      | $k_H = 0.257 \pm 0.018$       |
|               |             |                               | $R^2 = 0.91968$              | $R^2 = 0.47482$               |
|               | <b>48 h</b> | Null                          | $k_H = 0.144 \pm 0.005$      | $k_H = 0.160 \pm 0.017$       |
|               |             |                               | $R^2 = 0.76296$              | $R^2 = 0.19041$               |
| <b>3a</b>     | <b>26 h</b> | $k_H = 0.147 \pm 0.009$       | $k_H = 0.166 \pm 0.005$      | $k_H = 0.199 \pm 0.025$       |
|               |             | $t_{lag} = -9.641 \pm 1.978$  | $t_{lag} = -2.326 \pm 0.843$ | $t_{lag} = -2.629 \pm 1.430$  |
|               |             | $R^2 = 0.90983$               | $R^2 = 0.96329$              | $R^2 = 0.70826$               |
|               | <b>48 h</b> | $k_H = 0.121 \pm 0.005$       | $k_H = 0.130 \pm 0.006$      | $k_H = 0.126 \pm 0.011$       |
|               |             | $t_{lag} = -17.133 \pm 2.585$ | $t_{lag} = -8.784 \pm 3.550$ | $t_{lag} = -10.880 \pm 3.330$ |
|               |             | $R^2 = 0.94388$               | $R^2 = 0.88910$              | $R^2 = 0.83860$               |

**Table S9.** Curve-fitting parameters calculated when considering the Baker-Lonsdale model for RSV release studies to 1-octanol. Mean  $\pm$  SE (n=3).

| Kinetic model | Time | NLC                                                                                              | NLC-Su                                                                                           | NLC-Su-R                                                                                         |
|---------------|------|--------------------------------------------------------------------------------------------------|--------------------------------------------------------------------------------------------------|--------------------------------------------------------------------------------------------------|
| 4             | 28 h | $k_{BL} = 6 \cdot 10^{-5} \pm 1 \cdot 10^{-5}$<br>$R^2 = 0.89340$                                | $k_{BL} = 4 \cdot 10^{-5} \pm 1 \cdot 10^{-5}$<br>$R^2 = 0.85960$                                | $k_{BL} = 7 \cdot 10^{-5} \pm 1 \cdot 10^{-5}$<br>$R^2 = 0.95420$                                |
|               | 48 h | $k_{BL} = 6 \cdot 10^{-5} \pm 1 \cdot 10^{-5}$<br>$R^2 = 0.91100$                                | $k_{BL} = 4 \cdot 10^{-5} \pm 2 \cdot 10^{-5}$<br>$R^2 = 0.88950$                                | $k_{BL} = 7 \cdot 10^{-5} \pm 2 \cdot 10^{-5}$<br>$R^2 = 0.94440$                                |
| 4a            | 28 h | $k_{BL} = 8 \cdot 10^{-5} \pm 1 \cdot 10^{-5}$<br>$t_{lag} = 2.087 \pm 0.387$<br>$R^2 = 0.98570$ | $k_{BL} = 5 \cdot 10^{-5} \pm 1 \cdot 10^{-5}$<br>$t_{lag} = 2.709 \pm 0.090$<br>$R^2 = 0.98940$ | $k_{BL} = 9 \cdot 10^{-5} \pm 1 \cdot 10^{-5}$<br>$t_{lag} = 1.067 \pm 0.003$<br>$R^2 = 0.99600$ |
|               | 48 h | $k_{BL} = 8 \cdot 10^{-5} \pm 1 \cdot 10^{-5}$<br>$t_{lag} = 2.040 \pm 0.343$<br>$R^2 = 0.98040$ | $k_{BL} = 5 \cdot 10^{-5} \pm 1 \cdot 10^{-5}$<br>$t_{lag} = 2.652 \pm 0.111$<br>$R^2 = 0.98610$ | $k_{BL} = 8 \cdot 10^{-5} \pm 2 \cdot 10^{-5}$<br>$t_{lag} = 0.908 \pm 0.055$<br>$R^2 = 0.97110$ |

**Table S10.** Curve-fitting parameters calculated when considering the Baker-Lonsdale model for the RSV release studies to citrate buffer pH 5.5. Mean  $\pm$  SE (n=3).

| Kinetic model | Time    | NLC                                                                                               | NLC-Su                                                                                              | NLC-Su-R                                                                                            |
|---------------|---------|---------------------------------------------------------------------------------------------------|-----------------------------------------------------------------------------------------------------|-----------------------------------------------------------------------------------------------------|
| 4             | 24 days | $k_{BL} = 2.1 \cdot 10^{-4} \pm 1 \cdot 10^{-5}$<br>$R^2 = 0.85420$                               | $k_{BL} = 2 \cdot 10^{-4} \pm 1 \cdot 10^{-5}$<br>$R^2 = 0.98690$                                   | $k_{BL} = 1.5 \cdot 10^{-4} \pm 2 \cdot 10^{-5}$<br>$R^2 = 0.94180$                                 |
| 4a            | 24 days | $k_{BL} = 2 \cdot 10^{-4} \pm 1 \cdot 10^{-5}$<br>$t_{lag} = -0.651 \pm 0.001$<br>$R^2 = 0.94800$ | $k_{BL} = 1.9 \cdot 10^{-4} \pm 1 \cdot 10^{-5}$<br>$t_{lag} = -0.204 \pm 0.280$<br>$R^2 = 0.98700$ | $k_{BL} = 1.3 \cdot 10^{-4} \pm 1 \cdot 10^{-5}$<br>$t_{lag} = -0.437 \pm 0.180$<br>$R^2 = 0.97790$ |

**Table S11.** Curve-fitting parameters calculated when considering the Baker-Lonsdale model for the RSV release studies to citrate buffer pH 5.5 containing 0.1% (w/v) of  $\beta$ -CD. Mean  $\pm$  SE (n=3).

| Kinetic model | Time | NLC                                                                                                 | NLC-Su                                                                                            | NLC-Su-R                                                                                           |
|---------------|------|-----------------------------------------------------------------------------------------------------|---------------------------------------------------------------------------------------------------|----------------------------------------------------------------------------------------------------|
| 4             | 26 h | $k_{BL} = 1.3 \cdot 10^{-4} \pm 1 \cdot 10^{-5}$<br>$R^2 = 0.92450$                                 | $k_{BL} = 1 \cdot 10^{-4} \pm 1 \cdot 10^{-5}$<br>$R^2 = 0.99510$                                 | $k_{BL} = 1.7 \cdot 10^{-4} \pm 2 \cdot 10^{-5}$<br>$R^2 = 0.92140$                                |
|               | 48 h | $k_{BL} = 1 \cdot 10^{-4} \pm 1 \cdot 10^{-5}$<br>$R^2 = 0.90720$                                   | $k_{BL} = 1 \cdot 10^{-4} \pm 1 \cdot 10^{-5}$<br>$R^2 = 0.99420$                                 | $k_{BL} = 1 \cdot 10^{-4} \pm 2 \cdot 10^{-5}$<br>$R^2 = 0.79390$                                  |
| 4a            | 26 h | $k_{BL} = 1.1 \cdot 10^{-4} \pm 3 \cdot 10^{-5}$<br>$t_{lag} = -1.004 \pm 0.232$<br>$R^2 = 0.96700$ | $k_{BL} = 1 \cdot 10^{-4} \pm 1 \cdot 10^{-5}$<br>$t_{lag} = -0.030 \pm 0.228$<br>$R^2 = 0.99510$ | $k_{BL} = 1.9 \cdot 10^{-4} \pm 1 \cdot 10^{-5}$<br>$t_{lag} = 0.188 \pm 0.102$<br>$R^2 = 0.92900$ |
|               | 48 h | $k_{BL} = 1 \cdot 10^{-4} \pm 1 \cdot 10^{-5}$<br>$t_{lag} = -1.125 \pm 0.262$<br>$R^2 = 0.97290$   | $k_{BL} = 1 \cdot 10^{-4} \pm 1 \cdot 10^{-5}$<br>$t_{lag} = -0.048 \pm 0.224$<br>$R^2 = 0.99430$ | $k_{BL} = 1 \cdot 10^{-4} \pm 1 \cdot 10^{-5}$<br>$t_{lag} = -1.367 \pm 0.529$<br>$R^2 = 0.85450$  |

**Table S12.** Curve-fitting parameters calculated when considering the Hixon-Crowell model for RSV release studies to 1-octanol. Mean  $\pm$  SE (n=3).

| Kinetic model | Time | NLC                                                                                                 | NLC-Su                                                                                              | NLC-Su-R                                                                                            |
|---------------|------|-----------------------------------------------------------------------------------------------------|-----------------------------------------------------------------------------------------------------|-----------------------------------------------------------------------------------------------------|
| 5             | 28 h | $k_{hc} = 1.9 \cdot 10^{-4} \pm 2 \cdot 10^{-5}$<br>$R^2 = 0.98520$                                 | $k_{hc} = 1.3 \cdot 10^{-4} \pm 1 \cdot 10^{-5}$<br>$R^2 = 0.99170$                                 | $k_{hc} = 3.0 \cdot 10^{-4} \pm 9 \cdot 10^{-5}$<br>$R^2 = 0.86820$                                 |
|               | 48 h | $k_{hc} = 1.9 \cdot 10^{-4} \pm 2 \cdot 10^{-5}$<br>$R^2 = 0.97160$                                 | $k_{hc} = 1.3 \cdot 10^{-4} \pm 1 \cdot 10^{-5}$<br>$R^2 = 0.96670$                                 | $k_{hc} = 2.4 \cdot 10^{-4} \pm 4 \cdot 10^{-5}$<br>$R^2 = 0.84290$                                 |
| 5a            | 28 h | $k_{hc} = 1.8 \cdot 10^{-4} \pm 1 \cdot 10^{-5}$<br>$t_{lag} = -0.749 \pm 0.148$<br>$R^2 = 0.99020$ | $k_{hc} = 1.3 \cdot 10^{-4} \pm 1 \cdot 10^{-5}$<br>$t_{lag} = -0.164 \pm 0.270$<br>$R^2 = 0.9919$  | $k_{hc} = 1.7 \cdot 10^{-4} \pm 1 \cdot 10^{-5}$<br>$t_{lag} = -3.166 \pm 0.516$<br>$R^2 = 0.93600$ |
|               | 48 h | $k_{hc} = 1.8 \cdot 10^{-4} \pm 1 \cdot 10^{-5}$<br>$t_{lag} = -0.839 \pm 0.077$<br>$R^2 = 0.97640$ | $k_{hc} = 1.2 \cdot 10^{-4} \pm 1 \cdot 10^{-5}$<br>$t_{lag} = -0.617 \pm 0.275$<br>$R^2 = 0.96860$ | $k_{hc} = 1.6 \cdot 10^{-4} \pm 2 \cdot 10^{-5}$<br>$t_{lag} = -3.485 \pm 0.003$<br>$R^2 = 0.91100$ |

**Table S13.** Curve-fitting parameters calculated when considering the Hixon-Crowell model for the RSV release studies to citrate buffer pH 5.5. Mean  $\pm$  SE (n=3).

| Kinetic model | Time    | NLC                         | NLC-Su                       | NLC-Su-R                    |
|---------------|---------|-----------------------------|------------------------------|-----------------------------|
| 5             | 24 days | $k_{hc} = 0.056 \pm 0.007$  | $k_{hc} = 0.043 \pm 0.001$   | $k_{hc} = 0.031 \pm 0.002$  |
|               |         | $R^2 = 0.59389$             | $R^2 = 0.98505$              | $R^2 = 0.95725$             |
| 5a            | 24 days | $k_{hc} = 0.034 \pm 0.003$  | $k_{hc} = 0.042 \pm 0.002$   | $k_{hc} = 0.027 \pm 0.001$  |
|               |         | $t_{lag} = 0.120 \pm 0.010$ | $t_{lag} = 0.0150 \pm 0.007$ | $t_{lag} = 0.040 \pm 0.008$ |
|               |         | $R^2 = 0.95243$             | $R^2 = 0.98692$              | $R^2 = 0.98114$             |

**Table S14.** Curve-fitting parameters calculated when considering the Hixon-Crowell model for the RSV release studies to citrate buffer pH 5.5 containing 0.1% (w/v) of  $\beta$ -CD. Mean  $\pm$  SE (n=3).

| Kinetic model | Time | NLC                           | NLC-Su                       | NLC-Su-R                     |
|---------------|------|-------------------------------|------------------------------|------------------------------|
| 5             | 26 h | $k_{hc} = 0.045 \pm 0.003$    | $k_{hc} = 0.037 \pm 0.060$   | $k_{hc} = 0.061 \pm 0.005$   |
|               |      | $R^2 = 0.49112$               | $R^2 = 0.73342$              | $R^2 = 0.51923$              |
|               | 48 h | $k_{hc} = 0.031 \pm 0.003$    | $k_{hc} = 0.024 \pm 0.003$   | $k_{hc} = 0.030 \pm 0.004$   |
|               |      | $R^2 = 0.14769$               | $R^2 = 0.81635$              | $R^2 = 0.0362$               |
| 5a            | 26 h | $k_{hc} = 0.013 \pm 0.002$    | $k_{hc} = 0.016 \pm 0.001$   | $k_{hc} = 0.044 \pm 0.006$   |
|               |      | $t_{lag} = -16.644 \pm 2.743$ | $t_{lag} = -6.570 \pm 1.270$ | $t_{lag} = -1.702 \pm 0.550$ |
|               | 48 h | $R^2 = 0.92214$               | $R^2 = 0.96225$              | $R^2 = 0.92352$              |
|               |      | $k_{hc} = 0.011 \pm 0.001$    | $k_{hc} = 0.013 \pm 0.001$   | $k_{hc} = 0.022 \pm 0.006$   |
|               |      | $t_{lag} = -16.779 \pm 2.793$ | $t_{lag} = -9.035 \pm 2.082$ | $t_{lag} = -5.708 \pm 2.289$ |
|               |      | $R^2 = 0.97062$               | $R^2 = 0.95771$              | $R^2 = 0.90797$              |

**Table S15.** Curve-fitting parameters calculated when considering the Kormeyer-Peppas model for RSV release studies to 1-octanol. Mean  $\pm$  SE (n=3).

| Kinetic model | Time | NLC                         | NLC-Su                      | NLC-Su-R                    |
|---------------|------|-----------------------------|-----------------------------|-----------------------------|
| 6             | 28 h | $k_{KP} = 0.099 \pm 0.011$  | $k_{KP} = 0.057 \pm 0.008$  | $k_{KP} = 0.177 \pm 0.032$  |
|               |      | $n = 0.659 \pm 0.025$       | $n = 0.775 \pm 0.036$       | $n = 0.481 \pm 0.046$       |
|               |      | $R^2 = 0.98830$             | $R^2 = 0.98990$             | $R^2 = 0.96090$             |
|               | 48 h | $k_{KP} = 0.134 \pm 0.012$  | $k_{KP} = 0.086 \pm 0.008$  | $k_{KP} = 0.206 \pm 0.031$  |
|               |      | $n = 0.529 \pm 0.002$       | $n = 0.614 \pm 0.021$       | $n = 0.404 \pm 0.034$       |
|               |      | $R^2 = 0.93110$             | $R^2 = 0.94340$             | $R^2 = 0.91370$             |
| 6a            | 28 h | $k_{KP} = 0.134 \pm 0.011$  | $k_{KP} = 0.112 \pm 0.011$  | $k_{KP} = 0.242 \pm 0.042$  |
|               |      | $t_{lag} = 0.872 \pm 0.001$ | $t_{lag} = 1.740 \pm 0.001$ | $t_{lag} = 0.980 \pm 0.001$ |
|               |      | $n = 0.571 \pm 0.016$       | $n = 0.580 \pm 0.026$       | $n = 0.386 \pm 0.045$       |
|               | 48 h | $R^2 = 0.99470$             | $R^2 = 0.99960$             | $R^2 = 0.9932$              |
|               |      | $k_{KP} = 0.221 \pm 0.015$  | $k_{KP} = 0.174 \pm 0.012$  | $k_{KP} = 0.326 \pm 0.043$  |
|               |      | $t_{lag} = 1.910 \pm 0.001$ | $t_{lag} = 2.500 \pm 0.005$ | $t_{lag} = 1.865 \pm 0.001$ |
|               |      | $n = 0.394 \pm 0.012$       | $n = 0.425 \pm 0.001$       | $n = 0.276 \pm 0.001$       |
|               |      | $R^2 = 0.96330$             | $R^2 = 0.97850$             | $R^2 = 0.97090$             |
